1

2

3 **Direct and context-dependent effects of light, temperature, and**  
4 **phytoplankton shape bacterial community composition**

5

6

7

8 Sara F. Paver<sup>1\*</sup>, Angela D. Kent<sup>1,2†</sup>

9

10 <sup>1</sup>Program in Ecology, Evolution, and Conservation Biology, University of Illinois, Urbana, IL,  
11 USA, 61801

12 <sup>2</sup>Department of Natural Resources and Environmental Sciences, University of Illinois  
13 Urbana, IL, USA, 61801

14

15

16

17

18 Running head: Direct and context-dependent effects

---

\* Present address: Department of the Geophysical Sciences, University of Chicago, Chicago, IL, 60637; [sara.paver@gmail.com](mailto:sara.paver@gmail.com)

† [akent@illinois.edu](mailto:akent@illinois.edu)

19 **Abstract**

20 Species interactions, environmental conditions, and stochastic processes work in concert to bring  
21 about changes in community structure. However, the relative importance of specific factors and  
22 how their combined influence affects community composition remain largely unclear. We  
23 conducted a multi-factorial experiment to 1) disentangle the direct and interaction-mediated  
24 effects of environmental conditions and 2) augment our understanding of how environmental  
25 context modulates species interactions. We focus on a planktonic system where interactions with  
26 phytoplankton effect changes in the composition of bacterial communities, and light and  
27 temperature conditions can influence bacteria directly as well as through their interactions with  
28 phytoplankton. Epilimnetic bacteria from two humic lakes were combined with phytoplankton  
29 assemblages from each lake (“home” or “away”) or a no-phytoplankton control and incubated  
30 for 5 days under all combinations of light (surface, ~25% surface irradiance) and temperature (5  
31 levels from 10°C to 25°C). Observed light effects were primarily direct while phytoplankton and  
32 temperature effects on bacterial community composition were highly interdependent. The  
33 influence of temperature on aquatic bacteria was consistently mediated by phytoplankton and  
34 most pronounced for bacteria incubated with “away” phytoplankton treatments, likely due to the  
35 availability of novel phytoplankton-derived resources. The effects of phytoplankton on bacterial  
36 community composition were generally increased at higher temperatures. Incorporating  
37 mechanisms underlying the observed interdependent effects of species interactions and  
38 environmental conditions into modeling frameworks may improve our ability to forecast  
39 ecological responses to environmental change.

40 **Keywords:** community succession, algal-bacterial interactions, context-dependence, microcosm,  
41 bacterioplankton, lake

42

## 43 **Introduction**

44 Species interactions, environmental conditions, and stochastic processes affect the  
45 abundance, diversity, and distribution of organisms in the environment. Determining the relative  
46 importance of specific factors and how they interact to structure communities remains a major  
47 challenge in ecology (Agrawal et al. 2007, Sutherland et al. 2012). Effects of environmental  
48 conditions on a population include direct effects that can potentially be characterized by single-  
49 species observations and experiments as well as indirect effects that depend on species  
50 interactions and require more community-focused approaches to detect and predict (Gilman et al.  
51 2010). Concurrently, the outcome (e.g., mutualism, parasitism) and strength of interspecific  
52 interactions can change depending on environmental conditions as well as community  
53 composition (He et al. 2013, Chamberlain et al. 2014). To predict how communities will respond  
54 to seasonal environmental fluctuations and long-term changes in climate, it is necessary to  
55 account for species interactions that mediate and are affected by environmental conditions.

56 The signal of changing environmental conditions can be muted, augmented, or relayed by  
57 interactions with other species including mutualism, competition, parasitism, and food web  
58 interactions (Gilman et al. 2010). Interaction-mediated effects of environmental change have  
59 consequences for local abundances and geographic distribution as well as phenology (Miller-  
60 Rushing et al. 2010, Wisz et al. 2012, HilleRisLambers et al. 2013). For example, competitive  
61 interactions, predators, consumers, disease agents, or the absence of a mutualist partner may  
62 counteract environmental changes expected to expand the geographic range or increase the local  
63 abundance of a species (Gilman et al. 2010, HilleRisLambers et al. 2013). Additionally, shifts in  
64 the phenology of one species can result in temporal mismatch and population declines in a  
65 mutualist partner or consumer species (Winder and Schindler 2004, Edwards and Richardson

66 2004). In many cases, effects of environmental changes mediated by species interactions are  
67 expected to be more consequential than direct effects of change (Davis et al. 1998).

68 In addition to species interactions modulating the signal of environmental change,  
69 environmental conditions can alter the outcome and strength of context-dependent species  
70 interactions. A change in outcome occurs when the effect of an interaction on a given species  
71 (positive, negative, or neutral) depends on the environment. For example, the net costs of plants  
72 associating with mycorrhizae can exceed the net benefits when nutrient availability is high or  
73 light availability is low (Johnson et al. 1997). Context-dependent outcomes have been observed  
74 for competition, mutualism, and predation, but are most frequently detected for mutualisms  
75 (Chamberlain et al. 2014). In contrast, variation in interaction strength, or the magnitude of effect  
76 sizes, across contexts is relatively consistent among interaction types (Chamberlain et al. 2014).  
77 Population-level interactions can cause shifts in community structure, making it important to  
78 investigate the consequences of context-dependence at the community level.

79 Planktonic communities from temperate lakes are well suited for investigating  
80 interactions between biotic and environmental factors. These communities undergo annually  
81 repeated seasonal succession driven both by species interactions and environmental conditions,  
82 and respond rapidly to experimental treatments (Kent et al. 2006, 2007, Sommer et al. 2012,  
83 Weisse et al. 2016). Moreover, lakes have been described as sentinels of climate change, in part,  
84 because they respond rapidly to changes in the environment (Adrian et al. 2009). Light  
85 availability and temperature are two ecologically important factors that respond to environmental  
86 change in lakes. Increases in dissolved organic carbon concentration, as have been observed in  
87 lakes across parts of North America and Europe (Monteith et al. 2007), decrease light availability  
88 due to more rapid light attenuation and shift the vertical distribution of heat towards the surface

89 (Bukaveckas and Robbins Forbes 2000, Read and Rose 2013). Global mean lake surface  
90 temperature has been increasing 0.34°C per decade in response to climate forcing (O'Reilly et al.  
91 2015). Long-term climate changes are overlaid on a dynamic system where light availability and  
92 temperature change with depth and over the course of a year, especially in lakes that stratify in  
93 the summer and mix in the fall and spring.

94 Light and temperature can influence bacterial community composition directly as well as  
95 through bacterial interactions with phytoplankton. Wavelength-specific light attenuation in the  
96 water column creates a spectrum of niches for phototrophs (Stomp et al. 2007), including  
97 photosynthetic organisms as well as photoheterotrophs (Martínez-García et al. 2011, Evans et al.  
98 2015). Additionally, bacterial growth is affected in a strain-specific manner by light in the  
99 ultraviolet range (Agogue et al. 2005, Hörtnagl et al. 2010). Bacteria have diverse optimal  
100 growth temperatures and ranges, such that temperature can determine outcomes of competition  
101 between bacterial populations (Upton et al. 1990, Hall et al. 2008). Phytoplankton interact with  
102 bacterioplankton through mechanisms that include selective grazing by mixotrophic  
103 phytoplankton (Flynn et al. 2012), serving as a habitat for bacterial epiphytes (Jasti et al. 2005),  
104 and providing species-specific resources as detritus (Van Hannen et al. 1999) or labile exudates  
105 released by living cells (Teeling et al. 2012, Sarmiento and Gasol 2012). As temperature  
106 increases, mixotrophic phytoplankton are theorized to become more heterotrophic; this has been  
107 experimentally demonstrated with the chrysophyte *Ochromonas* sp. (Wilken et al. 2012).  
108 Additionally, the concentration and composition of extracellular organic carbon excreted by  
109 phytoplankton depend on light and temperature conditions (Zlotnik and Dubinsky 1989, Parker  
110 and Armbrust 2005).

111 Our objective was to characterize the combined effects of phytoplankton, light, and  
112 temperature on bacterial community composition from two humic lakes in Northern Wisconsin  
113 where interactions with phytoplankton are partially responsible for orchestrating changes in  
114 bacterial composition through time (Kent et al. 2007, Paver et al. 2013). Change in light and  
115 temperature with depth is especially pronounced in darkly stained humic lakes (Huovinen et al.  
116 2003). We specifically aimed to determine 1) whether the influence of light and temperature on  
117 bacterial communities is mediated by phytoplankton and 2) whether the effects of interactions  
118 with phytoplankton depend on light and temperature conditions (Fig. S1). If light and  
119 temperature affect bacteria through interactions with phytoplankton, then it is expected that the  
120 variation in bacterial community composition explained by light and temperature treatment will  
121 be greater in microcosms where phytoplankton are present relative to those where phytoplankton  
122 are absent. If phytoplankton effects depend on the light and temperature context, the variation in  
123 bacterial community composition explained by phytoplankton will change under different light  
124 and temperature conditions.

125

## 126 **Materials and Methods**

### 127 *Study sites*

128 South Sparkling Bog (SSB; 46°00'13.6"N, 89°42'19.9"W) and Trout Bog (TB;  
129 46°02'27.5"N, 89°41'09.6"W) are two north temperate humic lakes in Vilas County, Wisconsin  
130 that have been studied as part of the North Temperate Lakes Microbial Observatory. SSB and TB  
131 were selected for their similarity in maximum depth (~8m) and differences in phytoplankton  
132 community composition (Paver et al. 2013). These lakes are characterized by acidic pH and high  
133 levels of dissolved organic carbon (Paver et al. 2013).

134 *Experimental design*

135           We conducted a multi-factorial microcosm experiment to determine the direct and  
136 interactive effects of phytoplankton presence and composition, temperature, and light on  
137 bacterial community composition. On 6 July 2011, microorganisms were collected from SSB and  
138 TB integrated epilimnion samples (0-1m). Filtration through a 1 $\mu$ m Polycap AS cartridge filter  
139 (Whatman, Piscataway, NJ, USA) was used to separate bacteria from larger organisms.  
140 Phytoplankton assemblages were collected by filtering lake water through a 100 $\mu$ m nylon mesh  
141 (Spectrum Laboratories, Rancho Dominguez, CA, USA) to remove zooplankton and collecting,  
142 then rinsing phytoplankton cells captured on a 20 $\mu$ m nylon mesh with SSB water filter-sterilized  
143 through a 0.2 $\mu$ m Polycap AS cartridge filter (Spectrum Laboratories), which allowed smaller  
144 organisms such as heterotrophic nanoflagellates and bacteria to pass through. Phytoplankton  
145 collected on 20 $\mu$ m mesh were resuspended in 0.2 $\mu$ m filter-sterilized water from SSB,  
146 concentrating phytoplankton from 40L of lake water to 2.5L of sterilized water. All  
147 combinations of bacteria from each lake (5L of 1 $\mu$ m filtered water) were combined with 0.25L  
148 of concentrated phytoplankton from one of the two lakes lake or a no-phytoplankton control  
149 (0.25L of 0.2 $\mu$ m filter-sterilized SSB water) in triplicate 10L LDPE cubitainers (I-Chem,  
150 Rockwood, TN, USA). Combined bacteria and phytoplankton were gently inverted to mix and  
151 then partitioned into 500ml clear glass bottles (Wheaton, Millville, NJ, USA) in a predetermined,  
152 randomized order (33 bottles/ treatment).

153           For each bacteria-phytoplankton combination, three bottles were used to characterize the  
154 initial community composition and three bottles were incubated for five days under each of five  
155 temperatures and two light levels (Fig. 1). Temperature treatments were established and  
156 maintained by continuously pumping defined proportions of high temperature ( $\sim$ 25 $^{\circ}$ C) surface

157 water and low temperature (~5°C) subsurface water (1:0, 3:1, 1:1, 1:3, 0:1) into floating plastic  
158 container incubators (0.73m x 0.53m x 0.46m, The Container Store, Coppell, TX, USA) (Fig.  
159 S2). High light and low light treatments were established by incubating bottles at the surface and  
160 bottom (~25% of surface irradiance) of each floating container incubator. Light and temperature  
161 conditions were monitored throughout the incubation using HOBO light and temperature  
162 pendant data loggers (Onset, Pocasset, MA, USA) with three loggers placed in each container:  
163 two at opposite corners at the surface and one on the bottom.

#### 164 *Microbial community analysis*

165 Microorganisms from initial samples and from each bottle microcosm following  
166 incubation were concentrated onto 0.22µm filters (Supor-200; Pall Gelman, East Hills, NY) and  
167 frozen at -20°C. DNA was extracted using FastDNA purification kits (MP Biomedicals, Solon,  
168 OH, USA). Bacterial community composition was characterized using automated ribosomal  
169 intergenic spacer analysis (ARISA) (Fisher and Triplett 1999) as described by Paver et al.  
170 (2013). Fluorescently labeled ARISA PCR amplicons were combined with a custom 100 – 1250  
171 bp Rhodamine X-labeled internal size standard (Bioventures, Murfreesboro, TN) and analyzed  
172 by the Keck Center for Functional Genomics at the University of Illinois via denaturing capillary  
173 electrophoresis using an ABI 3730XL Genetic Analyzer (Applied Biosystems Inc., Carlsbad,  
174 California, USA). Electropherograms from each sample were aligned and peaks greater than 500  
175 fluorescence units were sized and grouped into bins of operational taxonomic units using  
176 GeneMarker version 1.95 (SoftGenetics, State College, PA, USA). ARISA fragments known to  
177 correspond to chloroplasts were removed from the analysis. The signal strength of each peak was  
178 normalized to account for run-to-run variations in signal detection by dividing the area of  
179 individual peaks by the total fluorescence (area) detected in each profile.



180 *Statistical approach*

181           Pairwise Bray-Curtis similarities were calculated for every combination of samples using  
182 Hellinger-transformed ARISA data and visualized using non-metric multidimensional scaling in  
183 PRIMER version 6 (PRIMER-E Ltd, Plymouth Marine Laboratory, UK) (Clarke and Warwick,  
184 2001). Permutational multivariate analysis of variance (PERMANOVA) was used to test: 1) the  
185 effects of light and temperature on bacterial community composition following incubation for  
186 each combination of bacteria and phytoplankton and 2) the effect of each phytoplankton  
187 treatment (compared to the no phytoplankton control) on bacterial community composition at  
188 each light and temperature level, stratified by the bacterial community source lake.  
189 PERMANOVA is a non-parametric multivariate analysis of variance that generates p-values  
190 using permutations (McArdle and Anderson 2001, Anderson 2001). PERMANOVA tests were  
191 run using the `adonis` function from the `vegan` package (Oksanen et al. 2011) in the R statistical  
192 environment (R Core Development Team, 2010).

193

194 **Results**

195 *Direct and phytoplankton-mediated light and temperature effects*

196           Over the five-day incubation, phytoplankton presence and composition, light availability,  
197 and temperature affected bacterial community composition (Fig. 2). We assessed direct effects of  
198 light and temperature on bacterial communities by analyzing changes in bacterial community  
199 composition in no-phytoplankton control treatments. Light had a significant direct effect on the  
200 composition of bacterial communities from both lakes (Fig. 3). In contrast to light, temperature  
201 had a significant direct effect on the community composition of bacteria from SSB, but not  
202 bacteria from TB (Fig. 3).

203           The effects of light and temperature on bacteria incubated with phytoplankton depended  
204 on the specific combination of phytoplankton and bacteria (Fig. 3). When TB bacteria were  
205 incubated with their “home” phytoplankton, there was a significant interaction between light and  
206 temperature. Light explained small but significant variation in bacterial community composition  
207 when SSB bacteria were combined with their “home” phytoplankton. Significant light effects  
208 were not detected when bacteria were combined with phytoplankton from the “away” lake. In  
209 contrast, temperature had a consistently significant effect on the composition of bacterial  
210 communities when phytoplankton were present. Notably, the variation in bacterial community  
211 composition explained by temperature was higher for bacteria incubated with phytoplankton  
212 from the “away” lake than for bacteria incubated with phytoplankton from their “home” lake.

### 213 *Context-dependence of phytoplankton interactions*

214           We used percent variation in bacterial community composition explained by  
215 phytoplankton treatment to evaluate the strength of phytoplankton effects (Fig. 4). Prior to  
216 incubation, 22% of the variation in bacterial community composition in SSB phytoplankton and  
217 corresponding control treatments was explained by phytoplankton treatment. Following  
218 incubation, variation explained by SSB phytoplankton was only greater than the initial explained  
219 variation in microcosms incubated at the highest temperature (45% variation explained). In  
220 contrast, variation in bacterial community composition in TB phytoplankton and corresponding  
221 control treatments due to phytoplankton treatment was not significant prior to incubation  
222 ( $p>0.05$ ). At the coldest two temperatures, 13% and 19% more variation in bacteria community  
223 composition was explained by TB phytoplankton in low light compared to high light treatments.  
224 As temperature increased, the variation explained by TB phytoplankton generally increased until  
225 peaking at the second warmest temperature.

## 226 **Discussion**

227           It is well established that species interactions and environmental conditions act in concert  
228 to affect community composition, but how these factors combine to determine community  
229 composition is largely undefined. In this study we selected light, temperature, and  
230 phytoplankton-bacterial interactions to investigate the interplay among biotic and environmental  
231 factors at the community level. In general, observed treatment effects were highly similar across  
232 replicates, suggesting that deterministic processes controlled the development of bacterial  
233 communities over the course of the five-day experimental incubation. We observed direct light  
234 effects, phytoplankton-mediated temperature effects, and temperature- and light-dependent  
235 phytoplankton effects, each of which is explored below.

### 236 *Direct light effects*

237           Light had a consistent, direct effect on bacterial community composition in experimental  
238 microcosms. One potential explanation for the direct effect of light on bacterial composition is  
239 selection for phototrophic bacteria generally, or specific types of phototrophic bacteria.  
240 Organisms that harvest light energy are adapted to use specific wavelengths of light and, as a  
241 result, phototroph distribution within the water column reflects the available light spectrum (Vila  
242 and Abella 2001, Haverkamp et al. 2008). As our study lakes have high humic content, light  
243 spectra are enriched in long wavelength photons (>600nm) and light attenuates rapidly with  
244 increased depth, creating specific spectral niches across modest changes in depth (e.g., 0.5m)  
245 (Vila et al. 1998). Photoheterotrophic bacterial cells can comprise a sizable portion of lake  
246 bacterial communities, and change in abundance with depth (Mašín et al. 2008, Martínez-García  
247 et al. 2011, Lew et al. 2016). Alternatively, or perhaps additionally, direct effects of light may  
248 have been caused by ultraviolet radiation. Based on the transparency properties of borosilicate

249 glass, plankton were exposed to a fraction of long wave ultraviolet A radiation, but none of the  
250 ultraviolet B and shorter wavelengths of light, penetrating to their respective incubation depths  
251 (Döhning et al. 1996). Effects of ultraviolet radiation can decrease the growth efficiency of  
252 certain bacterial strains while having no effect or increasing the growth efficiency of other strains  
253 (Hörtnagl et al. 2010). It is additionally possible that products of dissolved organic matter  
254 photolysis, including low molecular weight dissolved organic matter and reactive oxygen species  
255 induced changes bacterial community composition (Glaeser et al. 2010, Paul et al. 2011).

#### 256 *Phytoplankton-mediated temperature effects*

257 In contrast to the effects of light, observed effects of temperature were primarily  
258 mediated through interactions with phytoplankton. Temperature had significant direct effects on  
259 bacterial community composition for SSB bacteria, but only marginally significant direct effects  
260 for TB bacteria. Lack of significant direct effects of temperatures spanning approximately 15°C  
261 on TB bacteria was surprising and may have been due to resource limitation. Alternatively,  
262 differences in the chemistry of the lake water added along with the bacterial treatment or the  
263 distribution of bacterial traits (e.g., ability to use light energy or breakdown available dissolved  
264 organic matter) may explain observed lake-specific differences in temperature response.  
265 Concentrations of dissolved organic carbon, total phosphorus, and total nitrogen tend to be  
266 higher in TB compared to SSB (Paver et al. 2013). Temperature effects were consistently  
267 significant in treatments with added phytoplankton, and enhanced in “away” phytoplankton  
268 treatments, potentially due to production of organic matter novel to the bacterial community  
269 (Fogg 1983, Sarmiento and Gasol 2012). Bacterial community composition is continuously  
270 shaped by interactions with phytoplankton from their “home” lake (Paver et al. 2013), so initial  
271 bacterial assemblages were acclimated to “home” phytoplankton resources. Our results provide

272 further evidence that bacteria rely on phytoplankton-derived dissolved organic carbon in darkly  
273 stained humic lakes with high background concentrations of dissolved organic carbon (Kritzberg  
274 et al. 2006, Kent et al. 2007).

275 Observed phytoplankton-dependent temperature effects along with previously published  
276 findings support a signal transduction hypothesis where changes in the environment are relayed  
277 to bacterial populations through their interactions with phytoplankton. In a suite of north  
278 temperate humic lakes (including SSB and TB), changes in the composition of phytoplankton  
279 assemblages were largely explained by environmental (e.g., water temperature, nutrients) and  
280 meteorological (e.g., photosynthetically active radiation, precipitation) factors (Kent et al. 2007).  
281 In contrast, changes in bacterial community composition were primarily explained by changes in  
282 phytoplankton population abundances and covariation between phytoplankton populations and  
283 the environment (Kent et al. 2007). Results from the current study provide experimental  
284 evidence that the signal of increased temperature in these lakes is largely relayed to bacteria by  
285 their interactions with phytoplankton. Experimental observations of Baltic Sea bacterial  
286 communities yielded a complementary result that phytoplankton bloom stage was a more  
287 important factor structuring bacterial communities than a 6°C change in temperature (Scheibner  
288 et al. 2013). Previous work on bacterial growth and activity provide additional support for  
289 environmental signal transduction via phytoplankton. Multiple regression and hierarchical  
290 partitioning analysis of data from 300 field studies indicated that temperature has a positive  
291 relationship with phytoplankton primary production, but not bacterial production (Faithfull et al.  
292 2011). Despite positive correlations between temperature and bacterial production, bacterial  
293 production was primarily explained by a combination of total phosphorus and primary  
294 productivity (Faithfull et al. 2011). At low temperatures, bacterial growth and activity are

295 frequently temperature limited (Simon and Wünsch 1998, Vrede 2005, Adams et al. 2010).  
296 When temperature is not limiting, bacterial growth in temperate lakes is commonly limited by  
297 phosphorus, dissolved organic carbon, or the two in combination (Vrede 2005). Phytoplankton  
298 clearly support bacterial growth and activity and have the potential to relay environmental  
299 signals to bacteria with which they interact.

### 300 *Temperature- and light- dependent of phytoplankton effects*

301 Effects of phytoplankton on bacterioplankton were temperature, and to a lesser extent,  
302 light dependent. Observed interdependence of temperature and phytoplankton effects is  
303 consistent with the framework that phytoplankton provide organic matter resources to bacteria  
304 (Cole 1982, Sarmento and Gasol 2012) and temperature regulates the flow of carbon from  
305 phytoplankton to bacteria (Overmann 2013, Scheibner et al. 2013). Notably, when bacteria from  
306 TB were incubated with “home” phytoplankton, there was a significant interaction between light  
307 and temperature (Fig. 3). In contrast to high light assemblages that became increasingly different  
308 from their initial composition along a somewhat linear trajectory in ordination space as  
309 temperature increased, low light assemblages exhibited a curved response (Fig. 2). Bacterial  
310 composition in the coldest low light treatment was uncharacteristically different from the initial  
311 assemblage relative to other assemblages incubated at that temperature. These observations may  
312 be explained by changes in the concentration and composition of phytoplankton exudates under  
313 different temperature and light conditions. Combined effects of light and temperature have been  
314 shown to affect the dominant metabolic pathways used to process carbon, thereby controlling  
315 exudate release (Parker and Armbrust 2005). Alternatively, the dominant mechanism of bacteria-  
316 phytoplankton interactions may change depending on light and temperature. For example, low

317 light conditions can increase the rate of bacterial consumption by mixotrophic phytoplankton  
318 under certain conditions (e.g., low nutrient availability; [McKie-Krisberg and Sanders 2014]).

319 *Consequences for planktonic microbial communities*

320 Observations that light has primarily direct effects on bacterioplankton, while  
321 temperature effects are mediated through interactions with phytoplankton, have implications for  
322 interpreting seasonal changes in planktonic communities and forecasting future changes. The  
323 pronounced, direct effect of light on bacterial community composition emphasizes the  
324 importance of collecting high-resolution samples over depth and incorporating mechanisms  
325 structuring bacterial communities into a depth-specific framework. Temperature is frequently  
326 correlated with the succession of aquatic bacterial communities (Crump and Hobbie 2005,  
327 Fuhrman et al. 2006, Shade et al. 2007). Our results demonstrate that, in some systems, much of  
328 the bacterial community response to temperature is fueled by their interactions with  
329 phytoplankton. Thus, if the objective is to forecast how bacterial community structure and  
330 function will change in response to environmental changes, it is necessary to incorporate the  
331 predicted response of phytoplankton and context-dependence of interactions linking  
332 phytoplankton and bacterial assemblages. For example, elevated temperature in mesocosms  
333 during the spring phytoplankton bloom in Kiel Bight accelerated the onset of the phytoplankton  
334 bloom, decreased the intensity of maximum chlorophyll a and particulate organic carbon by  
335 approximately 20%, and caused dissolved organic carbon concentrations to increase more  
336 rapidly than under ambient temperature conditions (Biermann et al. 2014).

337 Environmental context is critical for understanding how planktonic communities will  
338 change over time and in response to environmental change. Many of our observations were  
339 highly dependent on the biotic or environmental context – responses seen in one lake were not

340 replicated in the other and, for TB bacteria combined with TB phytoplankton, response to  
341 temperature depended on light availability. Context-dependence has also been described for  
342 bacterial production in high mountain lakes where bacterial response to solar radiation treatments  
343 depended on the presence of phytoplankton and whether bacteria were phosphorus-limited  
344 (Medina Sánchez et al. 2002). The prevalence of non-additive interaction effects among  
345 environmental factors emphasizes the importance of multi-factorial experimental investigations  
346 into drivers of microbial community composition and activity. It additionally underscores a need  
347 to identify mechanisms underlying context-dependent microbial responses and build these  
348 mechanisms into frameworks describing aquatic microbial community dynamics.

349 *Effects of interacting factors on community composition*

350         Phytoplankton, light availability, and temperature act in concert to bring about changes in  
351 bacterial community composition over time. Light availability directly affects bacterial  
352 community composition while interactions with phytoplankton amplify or relay the signal of  
353 increasing temperature to bacteria. The strength of phytoplankton interactions with bacteria,  
354 inferred through comparisons of bacterial community composition across temperature and light  
355 treatments relative to no-phytoplankton controls, depends on temperature. For certain  
356 combinations of phytoplankton and bacteria, the outcome of phytoplankton interactions appears  
357 to additionally be light dependent. The enhanced effect of “away” phytoplankton relative to  
358 “home” phytoplankton and the lack of consistent temperature effects in treatments without  
359 phytoplankton provide strong support for phytoplankton resources shaping bacterial  
360 communities and their response to environmental conditions. These findings emphasize the  
361 importance of observing population and community responses to multiple ecological drivers  
362 simultaneously and under a range of environmentally relevant conditions. Studies aimed at



363 understanding the effects of climate change frequently compare ambient temperature conditions  
364 to an elevated temperature treatment. Our results suggest that there are inflection points in  
365 community responses to temperature that would be overlooked in ambient vs. elevated  
366 temperature comparisons. The idea that under-sampling the range of potential temperatures  
367 constrains our ability to make general inferences about temperature effects is reinforced by  
368 studies that have investigated the effect of temperature on bacterial production and observed two  
369 temperature optima (Simon and Wünsch 1998, Adams et al. 2010). The problem of under-  
370 sampling treatment levels is potentially problematic for other factors as well, including light  
371 availability (Gu and Wyatt 2016). Movement away from context-specific observations towards  
372 generalizable, theoretical advances and identifying parameters that can be incorporated into  
373 predictive frameworks will depend on investigations such as this into the mechanisms driving  
374 observed changes in community composition.

375

### 376 **Acknowledgements**

377 We thank E. Baird, B. Crary and K. Hayek for assistance carrying out the experiment; K. Hayek  
378 for lab assistance; K. McMahon lab and the staff of UW-Madison Trout Lake Research Station  
379 for logistical support; C. Cáceres, W. Metcalf, A. Peralta, R. Whitaker and A. Yannarell for  
380 constructive feedback on earlier versions of this manuscript. Funding was provided by NSF grant  
381 MCB-0702653 to A.D.K. and NSF DDIG grant DEB-11-10623 DISS to S.F.P.

## 382 Literature cited

- 383 Adams, H. E., B. C. Crump, and G. W. Kling. 2010. Temperature controls on aquatic bacterial  
384 production and community dynamics in arctic lakes and streams. *Environmental*  
385 *Microbiology* 12:1319–1333.
- 386 Adrian, R. et al. 2009. Lakes as sentinels of climate change. *Limnology and Oceanography*  
387 54:2283–2297.
- 388 Agogue, H., F. Joux, I. Obernosterer, and P. Lebaron. 2005. Resistance of Marine  
389 Bacterioplankton to Solar Radiation. *Applied and Environmental Microbiology* 71:5282–  
390 5289.
- 391 Agrawal, A. A. et al. 2007. Filling key gaps in population and community ecology. *Frontiers in*  
392 *Ecology and the Environment* 5:145–152.
- 393 Anderson, M. J. 2001. A new method for non-parametric multivariate analysis of variance.  
394 *Austral ecology* 26:32–46.
- 395 Biermann, A., A. Engel, and U. Riebesell. 2014. Changes in organic matter cycling in a plankton  
396 community exposed to warming under different light intensities. *Journal of Plankton*  
397 *Research* 36:658–671.
- 398 Bukaveckas, P. A., and M. Robbins Forbes. 2000. Role of dissolved organic carbon in the  
399 attenuation of photosynthetically active and ultraviolet radiation in Adirondack lakes.  
400 *Freshwater Biology* 43:339–354.
- 401 Chamberlain, S. A., J. L. Bronstein, and J. A. Rudgers. 2014. How context dependent are species  
402 interactions? *Ecology Letters* 17:881–890.
- 403 Cole, J. J. 1982. Interactions between bacteria and algae in aquatic ecosystems. *Annual Review*  
404 *of Ecology and Systematics*.
- 405 Crump, B. C., and J. E. Hobbie. 2005. Synchrony and seasonality in bacterioplankton  
406 communities of two temperate rivers. *Limnology and Oceanography* 50:1718–1729.
- 407 Davis, A. J., L. S. Jenkinson, J. H. Lawton, B. Shorrocks, and S. Wood. 1998. Making mistakes  
408 when predicting shifts in species range in response to global warming. *Nature* 391:783–786.
- 409 Döhring, T., M. Köfferlein, S. Thiel, and H. K. Seidlitz. 1996. Spectral Shaping of Artificial UV-  
410 B Irradiation for Vegetation Stress Research. *Journal of Plant Physiology* 148:115–119.
- 411 Edwards, M., and A. J. Richardson. 2004. Impact of climate change on marine pelagic  
412 phenology and trophic mismatch. *Nature* 430:881–884.
- 413 Evans, C., P. R. Gómez-Pereira, A. P. Martin, D. J. Scanlan, and M. V. Zubkov. 2015.  
414 Photoheterotrophy of bacterioplankton is ubiquitous in the surface oligotrophic ocean.  
415 *Progress in Oceanography* 135:139–145.
- 416 Faithfull, C., A. K. Bergström, and T. Vrede. 2011. Effects of nutrients and physical lake  
417 characteristics on bacterial and phytoplankton production: A meta-analysis. *Limnology and*  
418 *Oceanography* 56:1703–1713.
- 419 Fisher, M. M., and E. W. Triplett. 1999. Automated approach for ribosomal intergenic spacer  
420 analysis of microbial diversity and its application to freshwater bacterial communities.  
421 *Applied and Environmental Microbiology* 65:4630–4636.
- 422 Flynn, K. J. et al. 2012. Misuse of the phytoplankton-zooplankton dichotomy: the need to assign  
423 organisms as mixotrophs within plankton functional types. *Journal of Plankton Research*  
424 35:3–11.
- 425 Fogg, G. E. 1983. The ecological significance of extracellular products of phytoplankton  
426 photosynthesis. *Botanica Marina* 26:3–14.

- 427 Fuhrman, J. A., I. Hewson, M. S. Schwalbach, J. A. Steele, M. V. Brown, and S. Naeem. 2006.  
428 Annually reoccurring bacterial communities are predictable from ocean conditions.  
429 Proceedings of the National Academy of Sciences 103:13104–13109.
- 430 Gilman, S. E., M. C. Urban, J. Tewksbury, G. W. Gilchrist, and R. D. Holt. 2010. A framework  
431 for community interactions under climate change. Trends in Ecology & Evolution 25:325–  
432 331.
- 433 Glaeser, S. P., H.-P. Grossart, and J. Glaeser. 2010. Singlet oxygen, a neglected but important  
434 environmental factor: short-term and long-term effects on bacterioplankton composition in a  
435 humic lake. Environmental Microbiology 12:3124–3136.
- 436 Gu, L. Y., and K. H. Wyatt. 2016. Light availability regulates the response of algae and  
437 heterotrophic bacteria to elevated nutrient levels and warming in a northern boreal peatland.  
438 Freshwater Biology 61:1442–1453.
- 439 Hall, E. K., C. Neuhauser, and J. B. Cotner. 2008. Toward a mechanistic understanding of how  
440 natural bacterial communities respond to changes in temperature in aquatic ecosystems. The  
441 ISME Journal 2:471–481.
- 442 Haverkamp, T. H. A., D. Schouten, M. Doeleman, U. Wollenzien, J. Huisman, and L. J. Stal.  
443 2008. Colorful microdiversity of Synechococcus strains (picocyanobacteria) isolated from  
444 the Baltic Sea. The ISME Journal 3:397–408.
- 445 He, Q., M. D. Bertness, and A. H. Altieri. 2013. Global shifts towards positive species  
446 interactions with increasing environmental stress. Ecology Letters 16:695–706.
- 447 HilleRisLambers, J., M. A. Harsch, A. K. Ettinger, K. R. Ford, and E. J. Theobald. 2013. How  
448 will biotic interactions influence climate change-induced range shifts? Annals of the New  
449 York Academy of Sciences 1297:112–125.
- 450 Hörtnagl, P., M. T. Pérez, and R. Sommaruga. 2010. Contrasting effects of ultraviolet radiation  
451 on the growth efficiency of freshwater bacteria. Aquatic Ecology 45:125–136.
- 452 Huovinen, P. S., H. Penttilä, and M. R. Soimasuo. 2003. Spectral attenuation of solar ultraviolet  
453 radiation in humic lakes in Central Finland. Chemosphere 51:1–10.
- 454 Jasti, S., M. E. Sieracki, N. J. Poulton, M. W. Giewat, and J. N. Rooney-Varga. 2005.  
455 Phylogenetic Diversity and Specificity of Bacteria Closely Associated with Alexandrium  
456 spp. and Other Phytoplankton. Applied and Environmental Microbiology 71:3483–3494.
- 457 Johnson, N. C., J. H. Graham, and F. A. Smith. 1997. Functioning of mycorrhizal associations  
458 along the mutualism–parasitism continuum. New Phytologist 135:575–585.
- 459 Kent, A. D., A. C. Yannarell, J. A. Rusak, E. W. Triplett, and K. D. McMahon. 2007. Synchrony  
460 in aquatic microbial community dynamics. The ISME Journal 1:38–47.
- 461 Kent, A. D., S. E. Jones, G. H. Lauster, J. M. Graham, R. J. Newton, and K. D. McMahon. 2006.  
462 Experimental manipulations of microbial food web interactions in a humic lake: shifting  
463 biological drivers of bacterial community structure. Environmental Microbiology 8:1448–  
464 1459.
- 465 Kritzberg, E. S., J. J. Cole, M. M. Pace, and W. Granéli. 2006. Bacterial Growth on  
466 Allochthonous Carbon in Humic and Nutrient-enriched Lakes: Results from Whole-Lake  
467 <sup>13</sup>C Addition Experiments. Ecosystems 9:489–499.
- 468 Lew, S., M. Lew, and M. Koblížek. 2016. Influence of selected environmental factors on the  
469 abundance of aerobic anoxygenic phototrophs in peat-bog lakes. Environmental Science and  
470 Pollution Research:1–11.
- 471 Martínez-García, M. et al. 2011. High-throughput single-cell sequencing identifies  
472 photoheterotrophs and chemoautotrophs in freshwater bacterioplankton. The ISME Journal

- 473 6:113–123.
- 474 Mašín, M., J. Nedoma, L. Pechar, and M. Koblížek. 2008. Distribution of aerobic anoxygenic  
475 phototrophs in temperate freshwater systems. *Environmental Microbiology* 10:1988–1996.
- 476 McArdle, B. H., and M. J. Anderson. 2001. Fitting multivariate models to community data: a  
477 comment on distance-based redundancy analysis. *Ecology* 82:290–297.
- 478 McKie-Krisberg, Z. M., and R. W. Sanders. 2014. Phagotrophy by the picoeukaryotic green alga  
479 *Micromonas*: implications for Arctic Oceans 8:1953–1961.
- 480 Medina Sánchez, J. M., M. Villar Argai, and P. Carrillo. 2002. Modulation of the bacterial  
481 response to spectral solar radiation by algae and limiting nutrients. *Freshwater Biology*  
482 47:2191–2204.
- 483 Miller-Rushing, A. J., T. T. Hoye, D. W. Inouye, and E. Post. 2010. The effects of phenological  
484 mismatches on demography. *Philosophical Transactions of the Royal Society B: Biological*  
485 *Sciences* 365:3177–3186.
- 486 Monteith, D. T. et al. 2007. Dissolved organic carbon trends resulting from changes in  
487 atmospheric deposition chemistry. *Nature* 450:537–540.
- 488 Oksanen, J. et al. 2013. vegan: Community Ecology Package. R package version 2.0-6.  
489 <http://CRAN.R-project.org/package=vegan>
- 490 Overmann, P. J. 2013. Principles of Enrichment, Isolation, Cultivation, and Preservation of  
491 Prokaryotes. Pages 149–207 in *The Prokaryotes*. Springer Berlin Heidelberg, Berlin,  
492 Heidelberg.
- 493 O'Reilly, C. M. et al. 2015. Rapid and highly variable warming of lake surface waters around the  
494 globe. *Geophysical Research Letters* 42:10,773–10,781.
- 495 Parker, M. S., and E. V. Armbrust. 2005. Synergistic effects of light, temperature, and nitrogen  
496 source on transcription of genes for carbon and nitrogen metabolism in the centric diatom  
497 *Thalassiosira pseudonana* (Bacillariophyceae). *Journal of Phycology* 41:1142–1153.
- 498 Paul, A., C. Dziallas, E. Zwirnmann, E. T. Gjessing, and H.-P. Grossart. 2011. UV irradiation of  
499 natural organic matter (NOM): impact on organic carbon and bacteria. *Aquatic Sciences*  
500 74:443–454.
- 501 Paver, S. F. et al. 2013. Interactions between specific phytoplankton and bacteria affect lake  
502 bacterial community succession. *Environmental Microbiology* 15:2489–2504.
- 503 Read, J. S., and K. C. Rose. 2013. Physical responses of small temperate lakes to variation in  
504 dissolved organic carbon concentrations. *Limnology and Oceanography* 58:921–931.
- 505 Sarmiento, H., and J. M. Gasol. 2012. Use of phytoplankton-derived dissolved organic carbon by  
506 different types of bacterioplankton. *Environmental Microbiology* 14:2348–2360.
- 507 Scheibner, Von, M., P. Dörge, A. Biermann, U. Sommer, H.-G. Hoppe, and K. Jürgens. 2013.  
508 Impact of warming on phyto-bacterioplankton coupling and bacterial community  
509 composition in experimental mesocosms. *Environmental Microbiology* 16:718–733.
- 510 Shade, A., A. D. Kent, S. E. Jones, R. J. Newton, E. W. Triplett, and K. D. McMahon. 2007.  
511 Interannual dynamics and phenology of bacterial communities in a eutrophic lake.  
512 *Limnology and Oceanography* 52:487–494.
- 513 Simon, M., and C. Wünsch. 1998. Temperature control of bacterioplankton growth in a  
514 temperate large lake. *Aquatic Microbial Ecology* 16:119–130.
- 515 Sommer, U. et al. 2012. Beyond the Plankton Ecology Group (PEG) Model: Mechanisms  
516 Driving Plankton Succession. *Annual Review of Ecology, Evolution, and Systematics*  
517 43:429–448.
- 518 Stomp, M., J. Huisman, L. J. Stal, and H. C. P. Matthijs. 2007. Colorful niches of phototrophic

- 519 microorganisms shaped by vibrations of the water molecule. *The ISME Journal* 1:271–282.
- 520 Sutherland, W. J. et al. 2012. Identification of 100 fundamental ecological questions. *Journal of*  
521 *Ecology* 101:58–67.
- 522 Teeling, H. et al. 2012. Substrate-Controlled Succession of Marine Bacterioplankton Populations  
523 Induced by a Phytoplankton Bloom. *Science* 336:608–611.
- 524 Upton, A. C., D. B. Nedwell, and D. D. Wynn-Williams. 1990. The selection of microbial  
525 communities by constant or fluctuating temperatures. *FEMS Microbiology Letters* 74:243–  
526 252.
- 527 Van Hannen, E. J., W. Mooij, M. P. van Agterveld, H. J. Gons, and H. J. Laanbroek. 1999.  
528 Detritus-dependent development of the microbial community in an experimental system:  
529 qualitative analysis by denaturing gradient gel electrophoresis. *Applied and Environmental*  
530 *Microbiology* 65:2478–2484.
- 531 Vila, X., and C. A. Abella. 2001. Light-harvesting adaptations of planktonic phototrophic micro-  
532 organisms to different light quality conditions. *Hydrobiologia* 452:15–30.
- 533 Vila, X., X. P. Cristina, C. A. Abella, and J. P. Hurley. 1998. Effects of gilvin on the  
534 composition and dynamics of metalimnetic communities of phototrophic bacteria in  
535 freshwater North-American lakes. *Journal of applied microbiology* 85 Suppl 1:138S–150S.
- 536 Vrede, K. 2005. Nutrient and temperature limitation of bacterioplankton growth in temperate  
537 lakes. *Microbial Ecology* 49:245–256.
- 538 Weisse, T., B. Gröschl, and V. Bergkemper. 2016. Phytoplankton response to short-term  
539 temperature and nutrient changes. *Limnologia* 59:78–89.
- 540 Wilken, S., J. Huisman, S. Naus-Wiezer, and E. Van Donk. 2012. Mixotrophic organisms  
541 become more heterotrophic with rising temperature. *Ecology Letters* 16:225–233.
- 542 Winder, M., and D. E. Schindler. 2004. Climate change uncouples trophic interactions in an  
543 aquatic ecosystem. *Ecology* 85:2100–2106.
- 544 Wisz, M. S. et al. 2012. The role of biotic interactions in shaping distributions and realised  
545 assemblages of species: implications for species distribution modelling. *Biological Reviews*  
546 88:15–30.
- 547 Zlotnik, I., and Z. Dubinsky. 1989. The effect of light and temperature on DOC excretion by  
548 phytoplankton. *Limnology and Oceanography* 34:831–839.

549 **Figures**

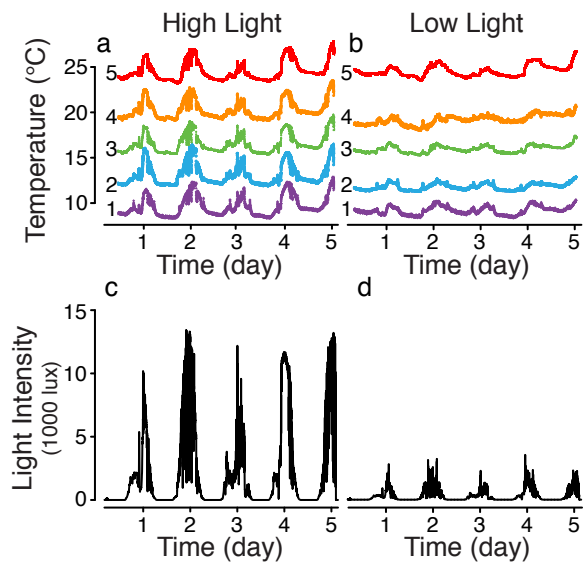

550

551 Figure 1. Temperature (a, b) and average light intensity (c, d) at the top (high light; a, c) and bottom (low  
552 light; b, d) of each temperature incubator over the five-day incubation. Temperature treatments are  
553 labeled 1 (coldest) to 5 (warmest).

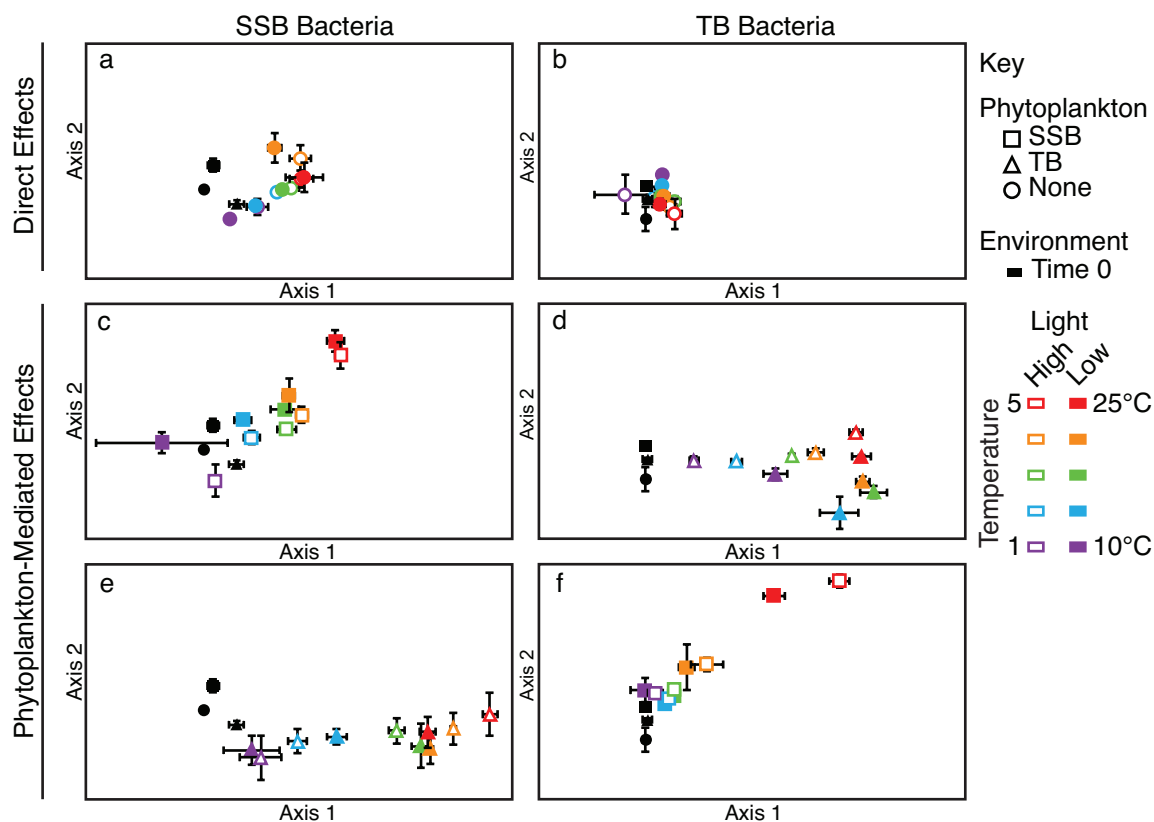

554  
555 Figure 2. Non-metric multidimensional scaling ordination of bacterial community composition in -  
556 microcosms (average  $\pm$  standard error) with SSB bacteria (a,c,e; stress value=0.08) and TB bacteria (b,d,f;  
557 stress value=0.14) before and after incubation. To simplify depiction of overlapping treatments,  
558 community composition in no-phytoplankton control microcosms following incubation is shown in plots  
559 a and b, community composition in “home” phytoplankton treatments is shown in plots c and d, and  
560 community composition in “away” phytoplankton treatments is shown in plots e and f. Community  
561 composition before incubation (Time 0) is included in all plots for reference.

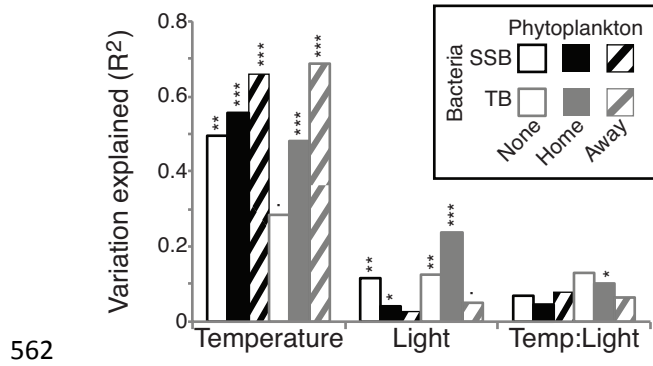

563 Figure 3. Variation in bacterial community composition explained by temperature, light, and the  
564 interaction between temperature and light for each combination of phytoplankton and bacteria. *P*  
565 values below 0.01 are indicated by symbols (\*\*\* <0.001, \*\* <0.01, \* < 0.05, . <0.1).



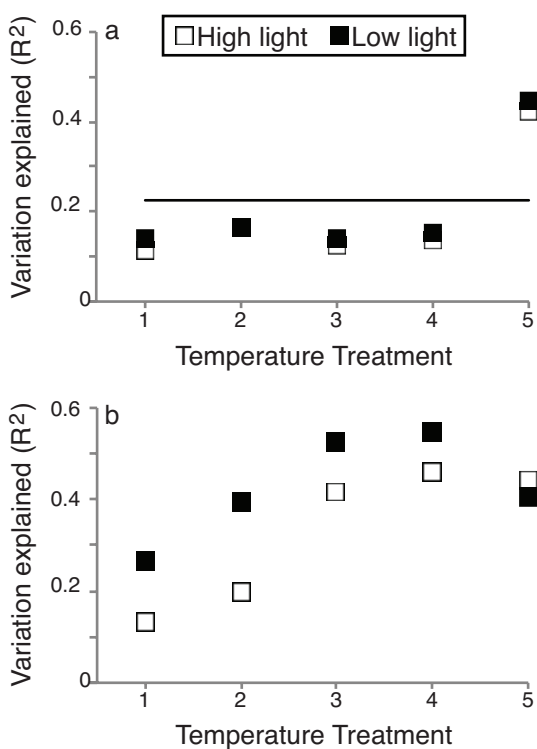

566

567 Figure 4. Variation in bacterial community composition explained by SSB phytoplankton  
568 treatment (a) and TB phytoplankton treatment (b) across all temperature and light conditions. A  
569 horizontal line indicates variation in bacterial community composition explained by SSB  
570 phytoplankton prior to incubation. TB phytoplankton did not explain significant variation in  
571 bacterial community composition before incubation.
